# Supplementary material for: Enhancing reporting quality and impact of early phase dose-finding clinical trials: CONSORT Dose-finding Extension (CONSORT-DEFINE) guidance
Source: PubMed Central journal article supplement (PMC10583500; doi:10.1136/bmj-2023-076387), 2023-10-20
Supplement: yapc076387.ww1.pdf [file yapc076387.ww1.pdf]

## Web appendix 1: Supplementary materials

**Figure S1.** Flow of CONSORT-DEFINE candidate items through the Delphi survey and DEFINE Consensus Meeting, including the decision criteria for inclusion in the checklist and the process for handling items that did not reach consensus

**Table S1.** CONSORT-DEFINE candidate items discussed at the DEFINE Consensus Meeting and voting results

**Table S2.** List of DEFINE International Consensus Meeting participants

**Table S3.** DEFINE Consensus Meeting participant characteristics

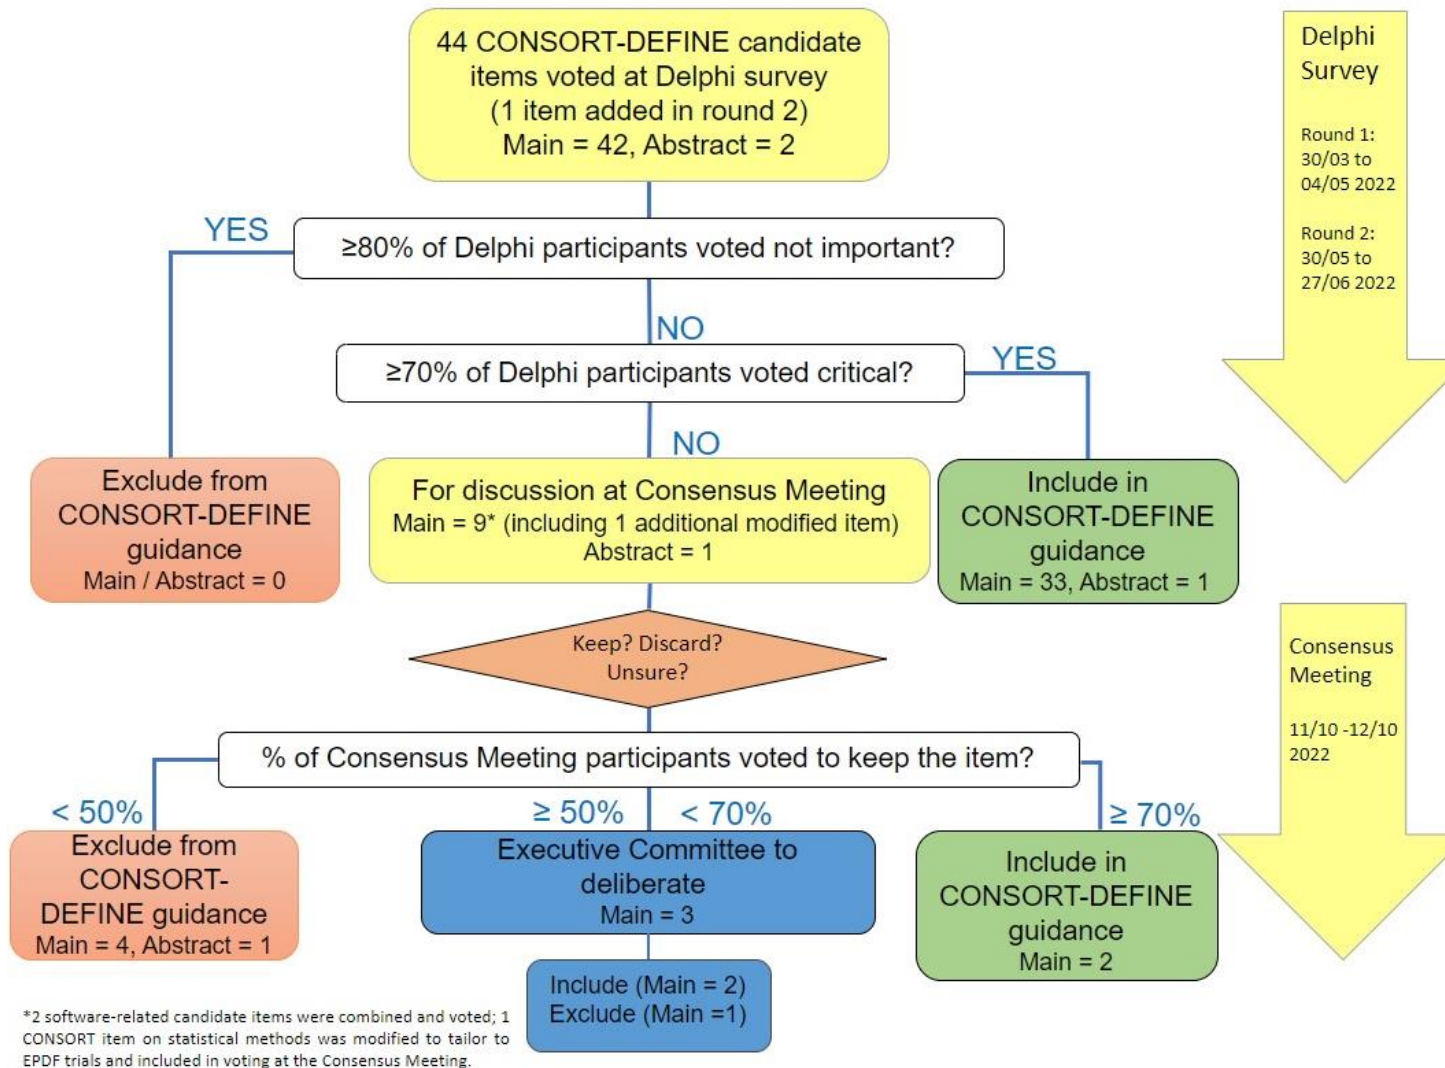

**Figure S1.** Flow of CONSORT-DEFINE candidate items through the Delphi survey and DEFINE Consensus Meeting, including the decision criteria for including the items in the checklist and the process for handling items that did not reach consensus

**Table S1. CONSORT-DEFINE candidate items discussed at the DEFINE Consensus Meeting and voting results**

| CONSORT-DEFINE candidate items discussed at the DEFINE Consensus Meeting |                          |                                                                                                                                                                                                                                                                                                         | DEFINE Consensus Meeting |            |           |          | Executive Committee decision |
|--------------------------------------------------------------------------|--------------------------|---------------------------------------------------------------------------------------------------------------------------------------------------------------------------------------------------------------------------------------------------------------------------------------------------------|--------------------------|------------|-----------|----------|------------------------------|
| Topic                                                                    | Delphi item number       | Delphi Item description                                                                                                                                                                                                                                                                                 | Voting x/n (%)           |            |           | Decision |                              |
|                                                                          |                          |                                                                                                                                                                                                                                                                                                         | Keep                     | Discard    | Unsure    |          |                              |
| Statistical methods (ACE-related item)                                   | *Not in Delphi           | Statistical methods used for primary and secondary outcomes, and <b>any other outcomes used to make pre-planned adaptations</b>                                                                                                                                                                         | 25/26 (96)               | 1/26 (4)   | 0/26 (0)  | KEEP     | N/A                          |
| Reporting of on-going trial results                                      | 69N                      | Specify if and when results (e.g., safety/response outcomes) were reported whilst the trial was still ongoing                                                                                                                                                                                           | 25/30 (83)               | 5/30 (17)  | 0/30 (0)  | KEEP     | N/A                          |
| Biomarkers                                                               | 6N                       | Summary of findings from existing correlative biomarker, correlative and associated studies to support planned biomarker sub-study (if applicable)                                                                                                                                                      | 14/24 (58)               | 10/24 (42) | 0/24 (0)  | UNSURE   | KEEP                         |
| Dosing regimens                                                          | 18N                      | Planned and delivered dosing regimens presented as a diagram or table, where applicable                                                                                                                                                                                                                 | 13/26 (50)               | 11/26 (42) | 2/26 (8)  | UNSURE   | KEEP                         |
| Statistical software (combined w/ access link for simulations)           | *55N (combined with 80N) | Statistical software and packages used for design (e.g., with access, or link to code/functions used for simulation studies) and analyses                                                                                                                                                               | 13/26 (50)               | 9/26 (35)  | 4/26 (15) | UNSURE   | DISCARD                      |
| Other relevant documents                                                 | 72N                      | Where the <u>full statistical analysis plan</u> and other relevant trial documents (Oversight Committee, Safety Review/Data Monitoring Committee Charter, quality aspects of investigational medicinal product, investigators brochure, simulation report, this list is non-exhaustive) can be accessed | 4/25 (16)                | 18/25 (72) | 3/25 (12) | DISCARD  | N/A                          |
| PPIE                                                                     | 75N                      | Involvement of patients, service users, their carers, members of public or patient advocates in any aspect of the trial and or reason why their involvement is not necessary                                                                                                                            | 10/26 (38)               | 15/26 (58) | 1/26 (4)  | DISCARD  | N/A                          |
| Lay summary                                                              | 77N                      | Lay summary of the trial results or where it can be accessed                                                                                                                                                                                                                                            | 7/25 (28)                | 17/25 (68) | 1/25 (4)  | DISCARD  | N/A                          |

| CONSORT-DEFINE candidate items discussed at the DEFINE Consensus Meeting |                    |                                                                                                                 | DEFINE Consensus Meeting |               |             |          | Executive Committee decision |
|--------------------------------------------------------------------------|--------------------|-----------------------------------------------------------------------------------------------------------------|--------------------------|---------------|-------------|----------|------------------------------|
| Topic                                                                    | Delphi item number | Delphi Item description                                                                                         | Voting x/n (%)           |               |             | Decision |                              |
|                                                                          |                    |                                                                                                                 | Keep                     | Discard       | Unsure      |          |                              |
| Access to full protocol/redacted version                                 | 70M                | Where the full trial protocol or the redacted version, with amendments (if any), can be accessed                | 7/29<br>(24)             | 21/29<br>(72) | 1/29<br>(3) | DISCARD  | N/A                          |
| Abstract - adaptations made                                              | 79N                | Dose decisions/adaptations were made in light of pre-planned decision-making criteria and observed accrued data | 8/28<br>(29)             | 19/28<br>(68) | 1/28<br>(4) | DISCARD  | N/A                          |

Two items were voted to be included and five were excluded from the CONSORT-DEFINE checklist at the DEFINE Consensus Meeting. Three candidate items that did not reach consensus were deliberated at the Executive Committee meeting, with the final decision to include two items in the checklist and exclude one.

N = New item; M = Modified item

\* 2 software-related candidate items were combined and voted; 1 CONSORT item on statistical methods was modified to tailor to EPDF trials and included in voting at the Consensus Meeting.

**Table S2. List of DEFINE International Consensus Meeting participants**

| <b>Name <sup>a</sup></b>                                | <b>Affiliation(s)</b>                                                          | <b>Country of work</b>   | <b>Self-reported Stakeholder Group</b>                                       |
|---------------------------------------------------------|--------------------------------------------------------------------------------|--------------------------|------------------------------------------------------------------------------|
| 1. Adrian Mander                                        | GlaxoSmithKline                                                                | United Kingdom           | Statistician/Trial methodologist                                             |
| 2. Agnes V Klein                                        | Health Canada                                                                  | Canada                   | Clinician;<br>Regulator                                                      |
| 3. Andrew Kightley                                      | Tarsius                                                                        | United Kingdom           | Patient and Participant Involvement representative                           |
| 4. Antoine Hommais                                      | Institut National du Cancer,                                                   | France                   | Funder                                                                       |
| 5. An-Wen Chan                                          | University of Toronto,                                                         | Canada                   | Clinician;<br>Ethics;<br>Journal editor;<br>Statistician/Trial methodologist |
| 6. Christina Yap<br>(Principal Investigator)            | The Institute of Cancer Research                                               | United Kingdom           | Funder;<br>Journal editor;<br>Regulator;<br>Statistician/Trial methodologist |
| 7. Christopher J Weir                                   | University of Edinburgh                                                        | United Kingdom           | Regulator;<br>Statistician/Trial methodologist                               |
| 8. Dawn Richards                                        | Clinical Trials Ontario                                                        | Canada                   | Patient and Participant Involvement representative                           |
| 9. Deborah Ashby<br>(Chair of DEFINE Consensus Meeting) | Imperial College London                                                        | United Kingdom           | Statistician/Trial methodologist                                             |
| 10. Elizabeth Garrett-Mayer                             | American Society of Clinical Oncology                                          | United States of America | Ethics;<br>Journal editor;<br>Statistician/Trial methodologist               |
| 11. James Matcham                                       | Cytel                                                                          | Australia                | Statistician/Trial methodologist                                             |
| 12. Thomas R Jeffrey Evans                              | University of Glasgow                                                          | United Kingdom           | Clinician;<br>Journal editor                                                 |
| 13. Johann de Bono                                      | The Institute of Cancer Research<br><br>The Royal Marsden NHS Foundation Trust | United Kingdom           | Clinician                                                                    |
| 14. John Isaacs                                         | Newcastle University                                                           | United Kingdom           | Clinician;<br>Funder;<br>Journal editor                                      |
| 15. Jordan Berlin                                       | Vanderbilt-Ingram Cancer Center                                                | United States of America | Clinician                                                                    |
| 16. Kathryn S Hayward                                   | University of Melbourne                                                        | Australia                | Clinician;<br>Trial management                                               |
| 17. Kate Williams <sup>c</sup>                          | Health Research Authority                                                      | United Kingdom           | Clinician;<br>Ethics;                                                        |
| 18. Khadija Rerhou Rantell                              | Medicines and Healthcare products Regulatory Agency                            | United Kingdom           | Statistician/Trial methodologist                                             |
| 19. Lesley McGuigan                                     | Cancer Research UK                                                             | United Kingdom           | Trial Management                                                             |
| 20. Lesley Seymour                                      | Queens University                                                              | Canada                   | Clinician;<br>Trial management                                               |

| <b>Name <sup>a</sup></b>    | <b>Affiliation(s)</b>                                                               | <b>Country of work</b>   | <b>Self-reported Stakeholder Group</b>                         |
|-----------------------------|-------------------------------------------------------------------------------------|--------------------------|----------------------------------------------------------------|
|                             |                                                                                     |                          | Statistician/Trial methodologist                               |
| 21. Lynley V Marshall       | Institute of Cancer Research<br><br>The Royal Marsden Hospital NHS Foundation Trust | United Kingdom           | Clinician                                                      |
| 22. Melanie Calvert         | Birmingham University                                                               | United Kingdom           | Statistician/Trial methodologist                               |
| 23. Mirat Shah <sup>b</sup> | Food and Drug Administration                                                        | United States of America |                                                                |
| 24. Moreno Ursino           | INSERM – French National Health Institute                                           | France                   | Statistician/Trial methodologist                               |
| 25. Munyaradzi Dimairo      | University of Sheffield                                                             | United Kingdom           | Funder;<br>Journal editor;<br>Statistician/Trial methodologist |
| 26. Olga Kholmanskikh       | European Medicines Agency                                                           | Belgium                  | Regulator                                                      |
| 27. Oliver Boix             | Bayer                                                                               | Germany                  | Statisticians/Trial methodologist                              |
| 28. Paul Frankel            | Journal of Clinical Oncology<br><br>City of Hope Comprehensive Cancer Centre        | United States of America | Ethics;<br>Journal editor;<br>Statistician/Trial methodologist |
| 29. Richard Peck            | University of Liverpool<br>F Hoffmann la Roche                                      | France                   | Clinician                                                      |
| 30. Robert Golub            | Journal of the American Medical Association                                         | United States of America | Journal editor                                                 |
| 31. Rong Liu                | Bristol-Myers Squibb                                                                | United States of America | Statistician/Trial methodologist                               |
| 32. Sally Hopewell          | University of Oxford                                                                | United Kingdom           | Statistician/Trial methodologist                               |
| 33. Shing Lee               | Columbia University                                                                 | United States of America | Statistician/Trial methodologist                               |
| 34. Susan Percy Ivy         | National Institute of Health                                                        | United States of America | Other (Regulatory Medical Officer)                             |
| 35. Yoshiya Tanaka          | University of Occupational and Environmental Health                                 | Japan                    | Clinician;<br>Journal editor                                   |

<sup>a</sup> DEFINE team members who helped facilitate the meeting but did not vote or take part in discussions: Aude Espinasse, Dhruvi Patel, Jan Rekowski, and Olga Solovyeva.

<sup>b</sup> Mirat Shah took part in the consensus meeting discussion but did not vote on any items.

<sup>c</sup> Kate Williams did not attend the consensus meeting or vote for any items but provided feedback via email.

**Table S3. DEFINE Consensus Meeting participant characteristics**

| <b>Participant Characteristics</b>                                              | <b>n (%)</b> |
|---------------------------------------------------------------------------------|--------------|
| <b>Roles</b> ( <i>multiple entries were permitted</i> )                         |              |
| Clinician / clinical pharmacologist                                             | 12 (34.3)    |
| Trial management staff (including trial manager / coordinator and data manager) | 3 (8.6)      |
| Statistician / trial methodologist / data scientist / quantitative analyst      | 17 (48.6)    |
| Regulator / Regulatory assessor or advisor                                      | 6 (17.1)     |
| Ethics committee / institutional review board member                            | 4 (11.4)     |
| Journal editor, associate editor, and conference abstracts committee member     | 9 (25.7)     |
| Funder / funding committee member                                               | 4 (11.4)     |
| Patient and Public Involvement representative / contributor / Patient Advocate  | 2 (5.7)      |
| Other:                                                                          | 2 (5.7)      |
| <b>Number of roles</b>                                                          |              |
| 1                                                                               | 21 (60.0)    |
| 2 or more                                                                       | 14 (40.0)    |
| <b>Clinical trials research experience (years)</b>                              |              |
| < 1                                                                             | 1 (2.9)      |
| 1-5                                                                             | 2 (5.7)      |
| 6-14                                                                            | 7 (20.0)     |
| 15 or more                                                                      | 25 (71.4)    |
| <b>Early phase clinical trials experience (years)</b>                           |              |
| < 1                                                                             | 2 (5.7)      |
| 1-5                                                                             | 5 (14.3)     |
| 6-14                                                                            | 7 (20.0)     |
| 15 or more                                                                      | 21 (60.0)    |
| <b>Type of clinical trials experience</b>                                       |              |
| Cancer patient trials                                                           | 9 (25.7)     |
| Non-cancer patient trials                                                       | 5 (14.3)     |
| Cancer patient trials + non-cancer patient trials                               | 5 (14.3)     |
| Trials involving healthy volunteers + non-cancer patient trials                 | 1 (2.9)      |
| All of the above                                                                | 10 (28.6)    |
| None of the above                                                               | 5 (14.3)     |
| <b>Country</b>                                                                  |              |
| Australia                                                                       | 2 (5.7)      |
| Belgium                                                                         | 1 (2.9)      |
| Canada                                                                          | 4 (11.4)     |
| France                                                                          | 3 (8.6)      |
| Germany                                                                         | 1 (2.9)      |
| Japan                                                                           | 1 (2.9)      |
| United Kingdom                                                                  | 15 (42.9)    |
| United States of America                                                        | 8 (22.9)     |
